# Supplementary material for: Reversible hydrogels from amphiphilic polyelectrolyte model multiblock copolymers: the importance of macromolecular topology
Source: Royal Society of Chemistry journal article supplement (doi:10.1039/c0sm00489h), 2010-01-01
Supplement: c0sm00489h.pdf [file c0sm00489h.pdf]

## Supporting Information

### Reversible Hydrogels from Amphiphilic Polyelectrolyte Model Multiblock Copolymers: The Importance of Macromolecular Topology

**Maria-Teodora Popescu, Ioannis Athanasoulas, Constantinos Tsitsilianis\***  
*Department of Chemical Engineering, University of Patras 26504, Patras, Greece  
and Institute of Chemical Engineering and High Temperature Chemical Processes,  
ICE/HT-FORTH, P. O. Box 1414, 26504 Patras, Greece*

**Natalia A. Hadjiantoniou, Costas S. Patrickios**  
*Department of Chemistry, University of Cyprus, P. O. Box 20537,  
1678 Nicosia, Cyprus*

### Static Light Scattering (SLS)

SLS experiments were performed in order to determine the micellar characteristics of the copolymers. In Figure S1, the concentration dependence of the inverse scattering intensity extrapolated to zero angle  $(Kc/\Delta I)_{\theta=0}$  (inset of Figure S1) is shown. The characteristics of the systems determined by SLS are summarized in Table S1. In Figure S2 it is presented the Zimm plot for the heptablock copolymer in acidic aqueous solutions of pH=6.

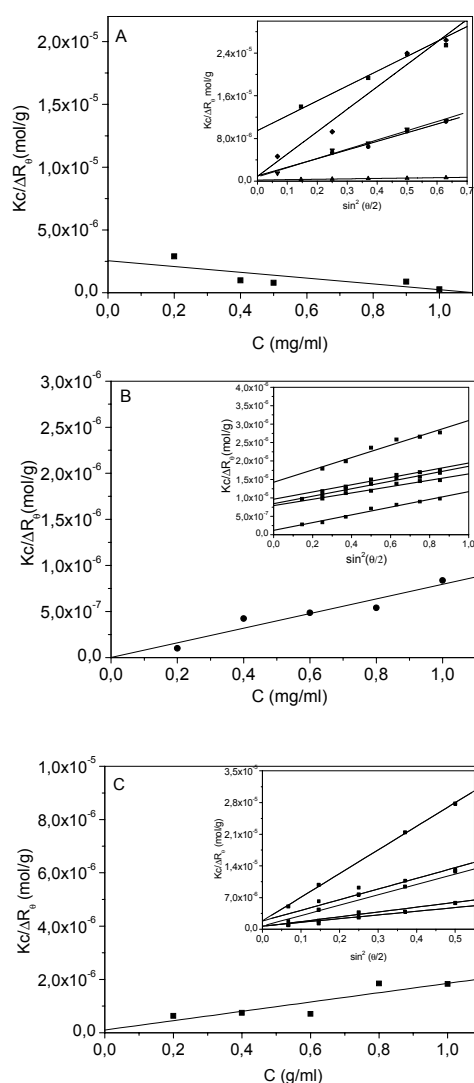

**Figure S1.** Inverse scattering intensity extrapolated to zero angle as a function of concentration of A)  $D_{25}$ - $b$ - $B_5$ - $b$ - $D_{25}$ - $b$ - $B_5$ - $b$ - $D_{25}$ , B)  $B_5$ - $b$ - $D_{25}$ - $b$ - $B_5$ - $b$ - $D_{25}$ - $b$ - $B_5$ - $b$ - $D_{25}$ - $b$ - $B_5$ , C)  $D_{25}$ - $b$ - $B_5$ - $b$ - $D_{25}$  in aqueous solutions of pH=6. Inset: angle  $\theta$  dependence of inverse scattering intensity for different concentrations.

**Table S1.** Characteristics of copolymer aggregates determined by SLS in aqueous solutions at pH 6 .

| No. | Polymer formula                                                      | $M_w$             | $N_{agg}$ |
|-----|----------------------------------------------------------------------|-------------------|-----------|
| 1   | $D_{25}-b-B_5-b-D_{25}-b-B_5-b-D_{25}$                               | $3,9 \times 10^5$ | 18        |
| 2   | $B_5-b-D_{25}-b-B_5-b-D_{25}-b-B_5-b-D_{25}-b-B_5$                   | $9,8 \times 10^7$ | 2880      |
| 3   | $D_{25}-b-B_5-b-D_{25}-b-B_5-b-D_{25}-b-B_5-b-D_{25}-b-B_5-b-D_{25}$ | $8,6 \times 10^5$ | 23        |

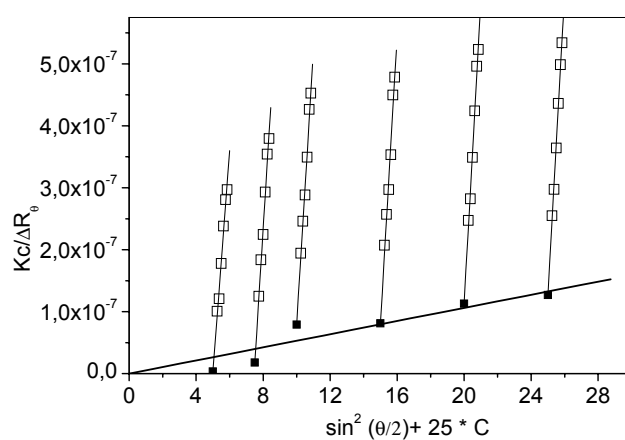**Figure S2.** Zimm plot of  $B_5-b-D_{25}-b-B_5-b-D_{25}-b-B_5-b-D_{25}-b-B_5$  in acidic aqueous solutions of pH=6 in the presence of 0,1 N NaCl. The apparent  $M_w$  was calculated  $2.1 \cdot 10^8$  g/mol and the corresponding  $N_{agg}=6200$ .

## Dynamic Light Scattering

The  $q^2$  dependence of the relaxation rate  $\Gamma$  in the low  $q$  limit is depicted in Figure S3. The translational diffusion coefficients were determined from the slope of the linear extrapolation, and the correspondent apparent hydrodynamic radius were calculated using Stokes-Einstein equation. The characteristics of the systems, as determined by DLS, are presented in Table S2.

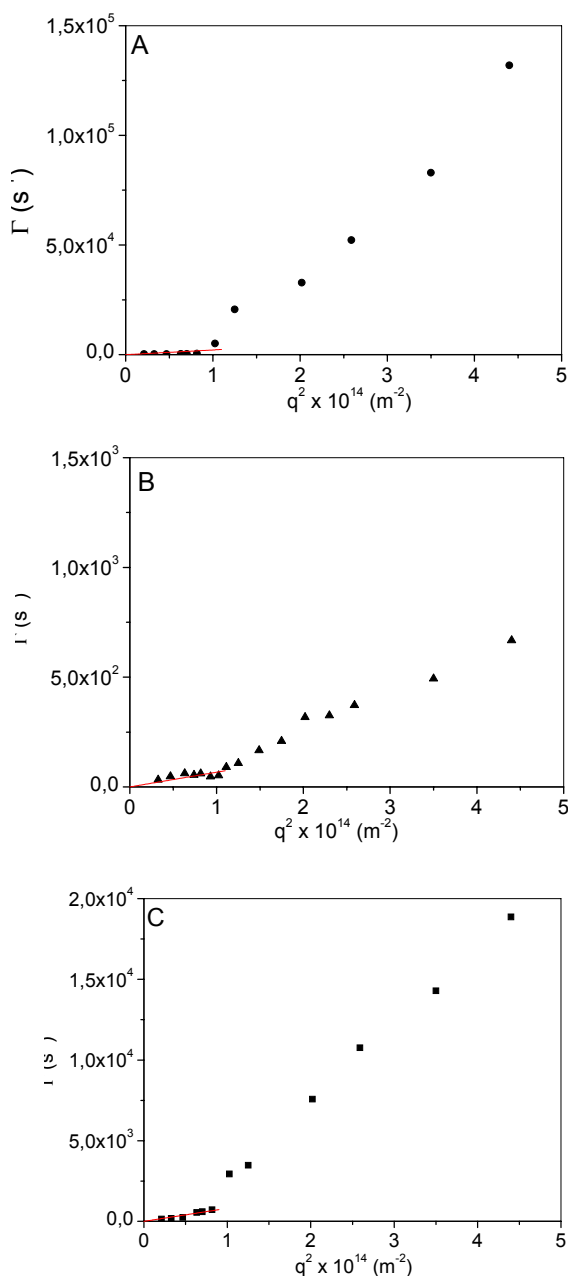

**Figure S3.** Characteristic  $q^2$  dependence of relaxation rate  $\Gamma$  for a concentration  $c=2 \times 10^{-4}$  g/ml, pH=6, NaCl 0.1M of : A) pentablock; B) heptablock; C) nonablock. Solid red lines fit a linear dependence in the low  $q$  limit ( $q \times R_H < 1$ ), where  $R_H$  is the hydrodynamic size of the diffusing particles.

**Table S2.** Characteristics of copolymers determined by DLS in aqueous solutions at pH 6.

| No. | Polymer formula                                                      | $D_T$ ( $m^2/s$ )      | $R_{H,app}$ (nm) |
|-----|----------------------------------------------------------------------|------------------------|------------------|
| 1   | $D_{25}-b-B_5-b-D_{25}-b-B_5-b-D_{25}$                               | $1,49 \times 10^{-11}$ | 16               |
| 2   | $B_5-b-D_{25}-b-B_5-b-D_{25}-b-B_5-b-D_{25}-b-B_5$                   | $6,3 \times 10^{-13}$  | 388              |
| 3   | $D_{25}-b-B_5-b-D_{25}-b-B_5-b-D_{25}-b-B_5-b-D_{25}-b-B_5-b-D_{25}$ | $9,43 \times 10^{-12}$ | 25               |
